# Supplementary material for: Characterization of Motor-Evoked Responses Obtained with Transcutaneous Electrical Spinal Stimulation from the Lower-Limb Muscles after Stroke
Source: MDPI journal article supplement (doi:10.3390/brainsci11030289), 2021-02-26
Supplement: s1 [file s1]

## **Supplementary Materials**

### **Characterization of motor evoked responses obtained with transcutaneous electrical spinal stimulation from the lower-limb muscles post stroke**

Yaejin Moon, PhD,<sup>\*1,2</sup> Taylor Zuleger, BS,<sup>\*3</sup> Martina Lamberti, MS,<sup>\*4</sup> Ashir Bansal, BS,<sup>2</sup> Chaithanya K. Mummidisetty, MS,<sup>1</sup> Kelly A. McKenzie, DPT,<sup>1</sup> Lindsey Yingling, DPT,<sup>1</sup> Sangeetha Madhavan, PT, PhD,<sup>5</sup> Elliot J. Roth, MD,<sup>1,2</sup> Richard L. Lieber, PhD,<sup>1,2,6</sup> Arun Jayaraman, PT, PhD<sup>1,2</sup>

<sup>1</sup> Shirley Ryan AbilityLab, Chicago, IL 60611, USA

<sup>2</sup>Feinberg School of Medicine, Northwestern University, Chicago, IL 60611, USA

<sup>3</sup>Department of Neuroscience, University of Cincinnati, Cincinnati, OH, 45221, USA

<sup>4</sup>Clinical Neurophysiology, University of Twente, Enschede, The Netherlands

<sup>5</sup>Department of Physical Therapy, University of Illinois, 1919 W Taylor St, Chicago, IL 60612, USA

<sup>6</sup>Edward Hines Jr, V.A. Hospital, Maywood IL 60141, USA

S1 Table: Statistical results of resting motor threshold as a function of group and side.

| Resting Motor Threshold (mA) |             | Paretic (Non-Dominant) |       | Non-Paretic |       | Group effect                                         | Group Difference post-hoc analysis     | Side effect                  |
|------------------------------|-------------|------------------------|-------|-------------|-------|------------------------------------------------------|----------------------------------------|------------------------------|
|                              |             | Mean                   | S.E.  | Mean        | S.E.  |                                                      |                                        |                              |
| TA                           | Stroke      | 128.98                 | 10.83 | 116.52      | 13.61 | $F_{(2,27)}=13.73$ ,<br>$p<.001^*$ ,<br>$\eta^2=.50$ | Stroke vs. Age-Matched:<br>$p=0.041^*$ | $t_{(9)}=1.12$ ,<br>$p=.293$ |
|                              | Age-Matched | 93.56                  | 6.50  | --          | --    |                                                      | Stroke vs. Young:<br>$p<0.001^*$       |                              |
|                              | Young       | 63.71                  | 6.89  | --          | --    |                                                      | Age-Matched vs. Young:<br>$p=0.005^*$  |                              |
| MG                           | Stroke      | 128.68                 | 12.52 | 121.25      | 9.85  | $F_{(2,27)}=9.89$ ,<br>$p=.001^*$ ,<br>$\eta^2=.42$  | Stroke vs. Age-Matched:<br>$p=0.032^*$ | $t_{(9)}=0.57$ ,<br>$p=.585$ |
|                              | Age-Matched | 93.18                  | 9.53  | --          | --    |                                                      | Stroke vs. Young:<br>$p<0.001^*$       |                              |
|                              | Young       | 67.19                  | 4.98  | --          | --    |                                                      | Age-Matched vs. Young:<br>$p=0.038^*$  |                              |

Note: For group comparison, sMEP data of the paretic-side of the stroke group were compared with that of the non-dominant side of the healthy controls. Note:  $*$ =  $p$ -value less than 0.050. TA=Tibialis Anterior; MG=Medial Gastrocnemius

S2 Table: Statistical results of slope of the sMER recruitment curve as a function of group and side.

|    | Slope<br>(normalized<br>EMG/mA) | Paretic<br>(Non-Dominant) |        | Non-Paretic |        | Group effect                    | Group Difference<br>post-hoc analysis | Side effect                  |
|----|---------------------------------|---------------------------|--------|-------------|--------|---------------------------------|---------------------------------------|------------------------------|
|    |                                 | Mean                      | S.E.   | Mean        | S.E.   |                                 |                                       |                              |
| TA | Stroke                          | 0.0341                    | 0.0110 | 0.0292      | 0.0075 | $F_{(2,27)}=0.09$ ,<br>$p=.910$ | N/A                                   | $t_{(9)}=0.23$ ,<br>$p=.827$ |
|    | Age-Matched                     | 0.0291                    | 0.0071 | --          | --     |                                 |                                       |                              |
|    | Young                           | 0.0305                    | 0.0060 | --          | --     |                                 |                                       |                              |
| MG | Stroke                          | 0.0340                    | 0.0080 | 0.0312      | 0.0067 | $F_{(2,27)}=0.34$ ,<br>$p=.718$ | N/A                                   | $t_{(9)}=0.15$ ,<br>$p=.882$ |
|    | Age-Matched                     | 0.0252                    | 0.0057 | --          | --     |                                 |                                       |                              |
|    | Young                           | 0.0294                    | 0.0064 | --          | --     |                                 |                                       |                              |

Note: For group comparison, sMEP data of the paretic-side of the stroke group were compared with that of the non-dominant side of the healthy controls. Note: \*=  $p$ -value less than 0.050. TA=Tibialis Anterior; MG=Medial Gastrocnemius, N/A=Not applicable post-hoc analysis due to lack of statistical significance of the main effect.

S3 Table: Statistical result of onset latency as a function of group and side.

| Latency (ms) |             | Paretic<br>(Non-Dominant) |      | Non-Paretic |      | Group effect                                         | Group Difference<br>post-hoc analysis                                                                             | Side effect                              |
|--------------|-------------|---------------------------|------|-------------|------|------------------------------------------------------|-------------------------------------------------------------------------------------------------------------------|------------------------------------------|
|              |             | Mean                      | S.E. | Mean        | S.E. |                                                      |                                                                                                                   |                                          |
| TA           | Stroke      | 19.33                     | 0.50 | 16.77       | 0.80 | $F_{(2,27)}=14.44$ ,<br>$p<.001^*$ ,<br>$\eta^2=.52$ | Stroke vs. Age-Matched:<br>$p<0.001^*$<br>Stroke vs. Young:<br>$p<0.001^*$<br>Age-Matched vs. Young:<br>$p=0.956$ | $t_{(9)}=2.82$ ,<br>$p=0.020$ , $d=0.35$ |
|              | Age-Matched | 15.91                     | 0.49 | --          | --   |                                                      |                                                                                                                   |                                          |
|              | Young       | 15.96                     | 0.53 | --          | --   |                                                      |                                                                                                                   |                                          |
| MG           | Stroke      | 17.89                     | 1.03 | 16.74       | 0.56 | $F_{(2,27)}=1.72$ ,<br>$p=.198$                      | N/A                                                                                                               | $t_{(9)}=1.17$ ,<br>$p=.272$             |
|              | Age-Matched | 16.63                     | 0.69 | --          | --   |                                                      |                                                                                                                   |                                          |
|              | Young       | 15.87                     | 0.44 | --          | --   |                                                      |                                                                                                                   |                                          |

Note: For group comparison, sMEP data of the paretic-side of the stroke group were compared with that of the non-dominant side of the healthy controls. Note:  $*$  =  $p$ -value less than 0.050. TA=Tibialis Anterior; MG=Medial Gastrocnemius, N/A=Not applicable post-hoc analysis due to lack of statistical significance of the main effect.
